# Supplementary material
Source: HighWire-hosted journal article supplement (https://ejhp.bmj.com/content/30/5/279)
Supplement: inline-supplementary-material-2 [file inline-supplementary-material-2.pdf]

**Supplemental information B: Additional patients and midwives' feedback**

| <b>Patients' positive feedback on SAM</b>                                                                                                                                    |
|------------------------------------------------------------------------------------------------------------------------------------------------------------------------------|
| Pain control was similar as I would at home.                                                                                                                                 |
| Really liked the independence so I can do other things                                                                                                                       |
| As my baby was on NNU it took away the stress to rush back                                                                                                                   |
| Feel more prepared for home                                                                                                                                                  |
| First day I felt under pressure to do SAM but on the next day I felt it was a positive experience                                                                            |
| First day I felt unsure but then it was better as the midwife helped her                                                                                                     |
| Found helpful                                                                                                                                                                |
| Gave me some control back which was nice                                                                                                                                     |
| Patient thought this was a good service.                                                                                                                                     |
| Patient said system is easy to use, easy access and good service                                                                                                             |
| Patient felt it was helpful to take own medicine and would do again                                                                                                          |
| Patient felt more in control. Midwife was unsure as she is used to giving patients their medicines                                                                           |
| Patient felt she would wish to do the SAM again. Midwife also thought it released her time.                                                                                  |
| Patient thought that it helped to manage her pain. Midwife was unsure as she had not done before                                                                             |
| Patient said she would recommend to a friend                                                                                                                                 |
| Patient will do again as found helpful. Midwife felt it released time                                                                                                        |
| Patient felt that SAM can release time for other patients                                                                                                                    |
| Patient would recommend to a friend                                                                                                                                          |
| Patient would wish to do SAM again                                                                                                                                           |
| Patient said she didn't have to ask for medicines and felt positive about this.                                                                                              |
| Saves time for everyone                                                                                                                                                      |
| Yes, much easier and no need to buzz and wait to get meds                                                                                                                    |
| More independence - helps 'training' for when at home                                                                                                                        |
| Preparation for SAM at home                                                                                                                                                  |
| Teaches you about what to do when you get home                                                                                                                               |
| Very useful to do as gave me independence                                                                                                                                    |
| More independence                                                                                                                                                            |
| More flexible. Allowed me to continue my normal routine of taking meds and I knew why and what I was taking rather than a midwife just giving me my medicines                |
| More efficient use of midwives' time tending to other needs of patients rather than dispensing routine analgesia to me                                                       |
| I think it is a good way to help understand how to take medication when you have to go home. Made me more aware of how and what I should take                                |
| Good to know more about medicines, delay on waking & whether they are actually needed (when you forget to take them and get sore)                                            |
| Didn't need to wait for my pain relief from MW. Felt more in control. Learned more about medication and how to use them properly                                             |
| A better understanding of medicines I would be discharged with                                                                                                               |
| Able to control pain relief without hassling staff                                                                                                                           |
| Already knowledgeable about meds as I'm a pharmacist                                                                                                                         |
| Did not have to bother people if I need pain meds                                                                                                                            |
| Very satisfied and would encourage others. Midwife not clear about the SAM process.                                                                                          |
| Very satisfied. Midwife tried to give me her medicines as well and she was confused why I refused                                                                            |
| Would bring in medicines if was told what I needed                                                                                                                           |
| Would participate again if I was well enough                                                                                                                                 |
| It worked for me but would not work for older patients                                                                                                                       |
| Would participate in SAM in a future admission if available and I did not have my own medicines available                                                                    |
| Felt I had a sense of autonomy in my recovery. Felt I wasn't 'pestering' busy midwives.                                                                                      |
| Felt more in control of pain relief. Could take PRN medicine as soon as I felt I needed it without having to buzz midwives. Freed up midwives' valuable time for other roles |
| It is very useful to have further information and also saves time being able to manage your own meds                                                                         |
|                                                                                                                                                                              |

| <b>Patients' negative comments about SAM</b>                                                                                                                                                          |
|-------------------------------------------------------------------------------------------------------------------------------------------------------------------------------------------------------|
| Although I thought I was capable in hindsight I should not have done it                                                                                                                               |
| Patient felt if many medicines then could be confusing. Medicine chart not easy to use.                                                                                                               |
| Patient would have liked this info on painkiller earlier from midwife as it was helpful                                                                                                               |
| Too many things to think about. Found stressful                                                                                                                                                       |
| Midwife signed 'self' on kardex inappropriately even though I was self-administering my medicines                                                                                                     |
| Would prefer a simpler/bigger form to sign. Would make it much easier                                                                                                                                 |
| Found process added stress at first and was happier just to ask midwife for pain relief as much easier when tired                                                                                     |
| I became unwell and I decided to stop SAM. It was good when I was well                                                                                                                                |
| The timing was bad. I was emotional as baby was in NNU. It took too long to explain. I found explanation patronising.                                                                                 |
| I haven't needed medication out with standard times and was tired when I had to take them - hassle of having to get up for meds post c section / risk of getting dose wrong                           |
| Patient felt she didn't realise it was optional to do SAM as she misunderstood and consented to do                                                                                                    |
| Sometime because patient is self-medicating then midwives did not check on them very often                                                                                                            |
| <b>Midwives' negative comments about SAM</b>                                                                                                                                                          |
| MW felt less involved with woman's care - ie pain management                                                                                                                                          |
| Not sure about SAM. I'm old school and missed my medicine trolley                                                                                                                                     |
| Not sure how it works and concerned about patients not administering correctly                                                                                                                        |
| Midwife has to do BP before meds anyway so better if she did meds.                                                                                                                                    |
| Going round with medications for others at same time anyway so see no point of SAM                                                                                                                    |
| Patient asked me to give her drugs each time                                                                                                                                                          |
| Had to prompt patient to take regular meds. Kardex missing from bedside so unable to give ibuprofen until found. Still required dalteparin and nifedipine to be given by midwives at specified times. |
| Patient not remembering to fill in Kardex                                                                                                                                                             |
| Patient forgot to sign one dose taken but quantity was correct                                                                                                                                        |
| Patient required prompting to remember                                                                                                                                                                |
| Patient was not well so had to stop SAM                                                                                                                                                               |
| Patient weepy and tired and felt she had so many things to concentrate on during night                                                                                                                |
| Midwife felt happier to give patient drugs rather than patient taking themselves                                                                                                                      |
| Midwife was not familiar with SAM and not sure what to do                                                                                                                                             |
| Patient felt overlooked as I was not at bedside often as patient was doing her own drugs                                                                                                              |
| Midwife was unsure regarding SAM process. Some patients took medicines late (no definition of late?)                                                                                                  |
| Patient left locker open with key                                                                                                                                                                     |
| Pt left key in locker – midwife conscious regarding safety of medicines and other people accessing locker                                                                                             |
| Patient found lockers awkward to use. Midwife said she is unsure of the SAM programme.                                                                                                                |
| Locker key not working and no pens for patients                                                                                                                                                       |
| Had to give meds as locker key was sticking                                                                                                                                                           |
| Key for locker sticking so midwife had to give patient medicine                                                                                                                                       |
| Patient was not remembering to fill in Kardex                                                                                                                                                         |
| Patient was tired and have a baby to look after                                                                                                                                                       |
| Lock on medicine locker difficult to lock and unlock again so needed help from staff to do so                                                                                                         |
| Faulty lockers/key so took longer for pharmacist to set up.                                                                                                                                           |
| Patient forgot to log dose but count correct and next day was good                                                                                                                                    |
| Midwife unsure of SAM process so not sure how useful.                                                                                                                                                 |
| Patient felt that it was good to have added support when needed.                                                                                                                                      |
| Midwife use medicines from this patient locker to give to another patient's dose so count was wrong                                                                                                   |
| Midwife would prefer a shorter logging paperwork                                                                                                                                                      |
| Checking that patient has correctly filled in on kardex and taken them effectively                                                                                                                    |
| As midwives we are taking on lots of extra roles. I feel that I would not have the time to assess and monitor the patients with regards to SA as well as all the other things I have to do            |
| Dalteparin was missed as patient was SAM and midwife thought patient was also administering her dalteparin but she was not trained (Note: all SAM patients on ward cumulative log sheet)              |
| Midwife at night not aware of SAM and gave medicines from her stock medicines whilst she did her rounds                                                                                               |
| Wrong amounts in medicine counts as night midwife gave medicines from own stock and not from patients' locker                                                                                         |

| <b>Midwives' positive comments about SAM</b>                                                                                                                                    |
|---------------------------------------------------------------------------------------------------------------------------------------------------------------------------------|
| Working well with support in place at present. Makes mum independent                                                                                                            |
| Allows me more time with women for midwifery/feeding care                                                                                                                       |
| Patient said process was easy to use and help her take her medicines                                                                                                            |
| Patient said she preferred this system of taking her medicines                                                                                                                  |
| Both patient and MW happy with SAM                                                                                                                                              |
| Found it very beneficial for this woman                                                                                                                                         |
| Patient said she would do again as good system. Midwife said set up by pharmacy make it helpful.                                                                                |
| Great for mums to be independent. Needs pharmacy technician and pharmacist support to be viable.                                                                                |
| Great system and worked well for this individual                                                                                                                                |
| Patient had baby on NNU so felt it gave her freedom and did not have to wait to get her medicines                                                                               |
| Patient very at ease with her medicines at discharge                                                                                                                            |
| Patients who are taking meds at home should be allowed to SA when in hospital                                                                                                   |
| Patient can manage own pain better                                                                                                                                              |
| Empowering to patients to remain in control of own meds                                                                                                                         |
| Patient very happy no waiting for pain relief and good pain control. Patient felt more control and more aware of what they are taking. overall good scheme and glad I took part |
| Gives patient independence especially if was already taking regular medicines before admission                                                                                  |
| Gives patients more independence with medicines                                                                                                                                 |
| Gives patient control over analgesia. Own decision making.                                                                                                                      |
| Good system for women with good awareness and without complex issues                                                                                                            |
| Keeps patient up to date and informed. Pharmacy technician helped midwives with discharge drugs                                                                                 |
| Mum able to have analgesia as soon as possible                                                                                                                                  |
| Midwife felt that this SAM release time to look after other patients                                                                                                            |
| Midwife felt that this SAM release time to look after other patients                                                                                                            |
| Midwife felt that SAM is positive and empowering for mums                                                                                                                       |
| Midwife found SAM useful. Patient said it is same as she manages medicines at home.                                                                                             |
| Midwife said SAM good for mums with baby on NNU                                                                                                                                 |
| All midwives must be made aware if her patient is SAM (Note this is logged on ward sheet)                                                                                       |
